# Supplementary material for: Elevated MACC1 Expression in Colorectal Cancer Is Driven by Chromosomal Instability and Is Associated with Molecular Subtype and Worse Patient Survival
Source: MDPI journal article supplement (doi:10.3390/cancers14071749), 2022-03-29
Supplement: s1 [file s1]

Supplementary Materials:

# Elevated MACC1 Expression in Colorectal Cancer Is Driven by Chromosomal Instability and Is Associated with Molecular Subtype and Worse Patient Survival

Vincent Vuaroqueaux, Alexandra Musch, Dennis Kobelt, Thomas Risch, Pia Herrmann, Susen Burock, Anne-Lise Peille, Marie-Laure Yaspo, Heinz-Herbert Fiebig and Ulrike Stein

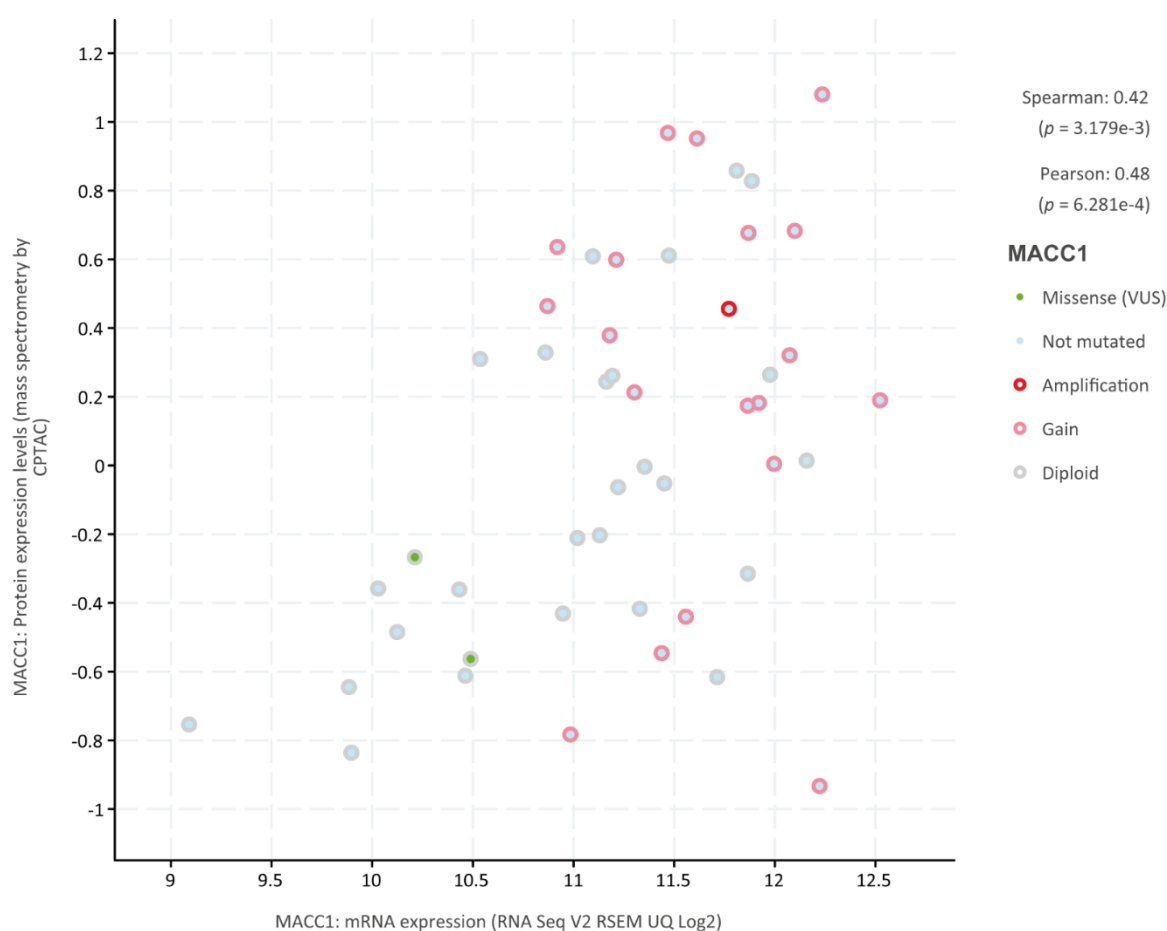

**Figure S1.** Scatter plot showing the correlation between MACC1 mRNA and protein levels in CRC patient tumors. MACC1 mRNA levels were determined by RNA-Seq (data RSEM normalized – log2 transformed) and protein levels were determined by using mass spectrometry. MACC1 CNA and mutation status of the samples are represented by coloured dots. The data are issued from a published CRC patient cohort ( $N = 48$ ) (DOI: <https://doi.org/10.1016/j.cell.2019.03.030>). Data were obtained from <https://www.cbioportal.org/> (accessed on 08.03.2022).

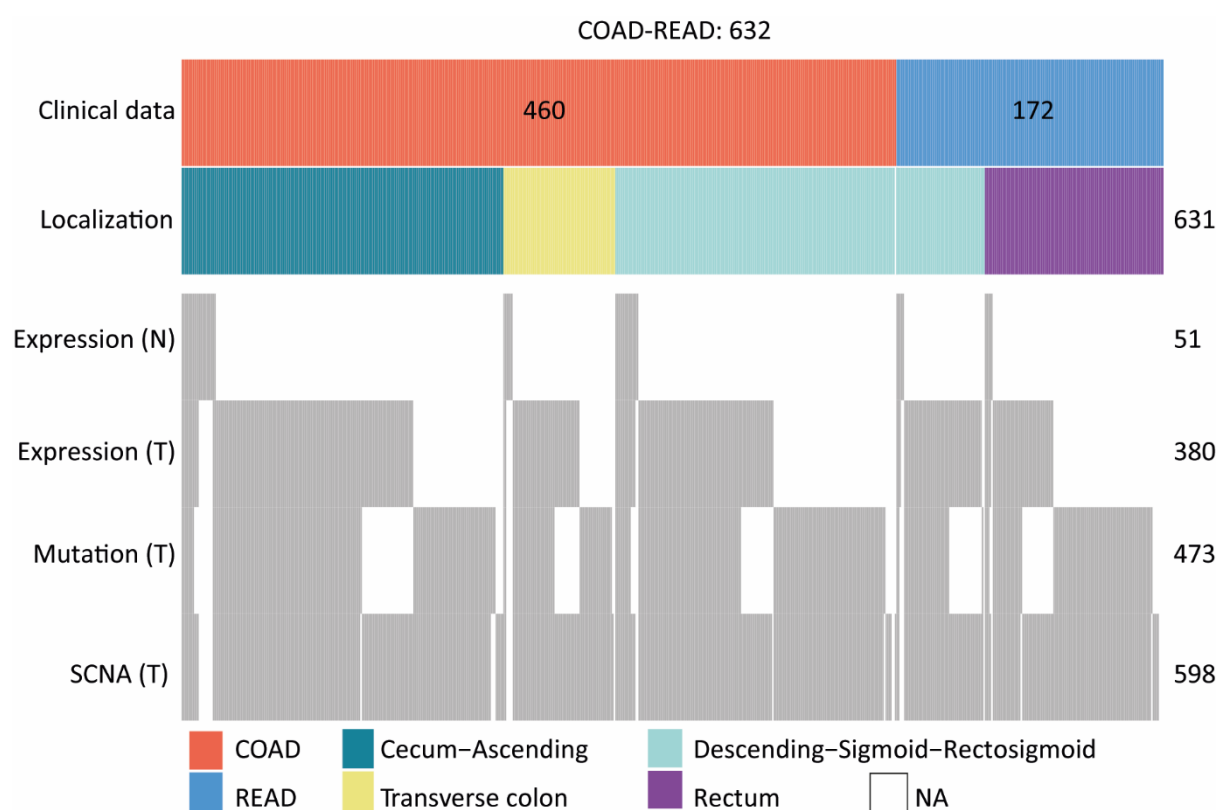

**Figure S2.** Visual representation of the number of samples and type of data in the analyzed COAD-READ TCGA2 dataset.

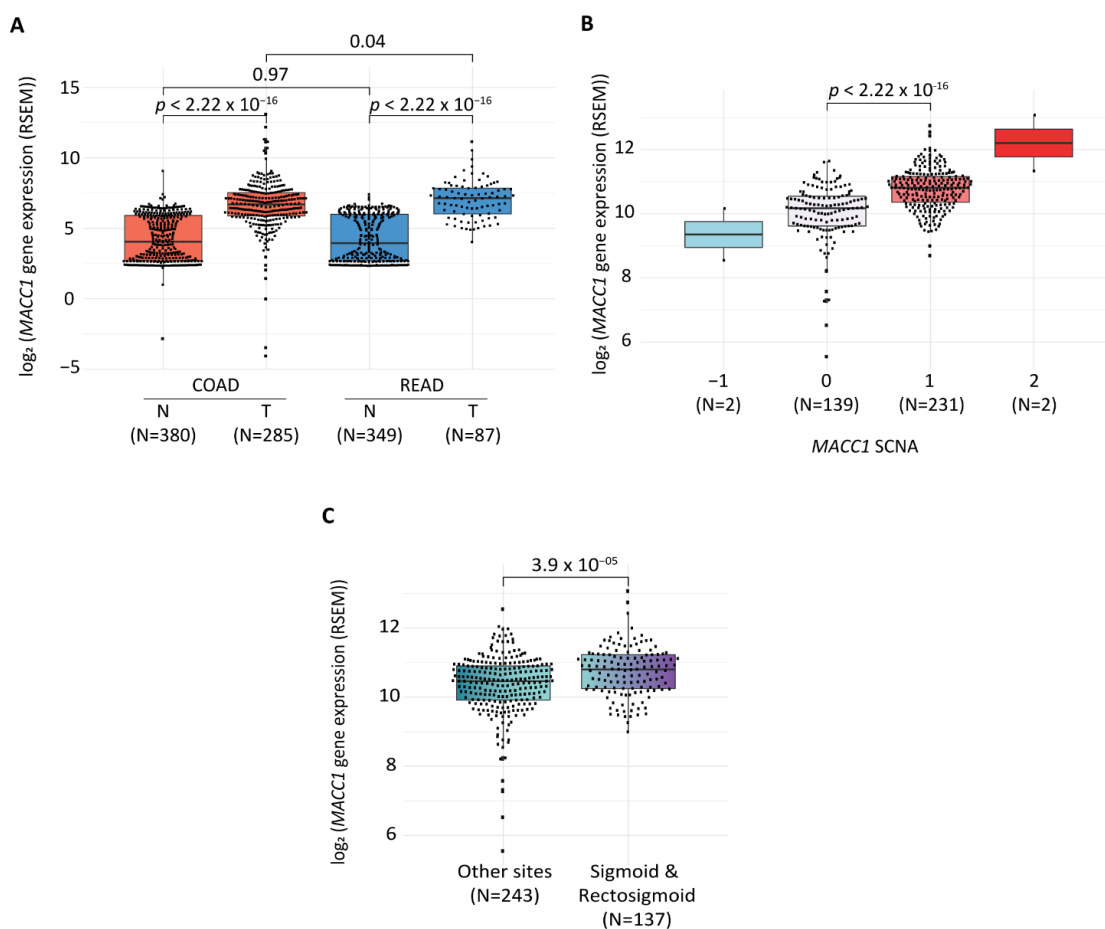

**Figure S3.** Statistical association of MACC1 SCNA and expression levels with CRC sample characteristics. A, Box plot showing MACC1 mRNA expression in normal and tumor tissues from the Wang et al. cohort of unified TCGA-GTEX colorectal samples [38]. B, MACC1 mRNA expression by MACC1 SCNA categories in the COAD-READ TCGA cohort. Horizontal bars indicate median values, boxes are interquartile range, whiskers indicate values within 1.5 times interquartile range. C, Box plot showing MACC1 mRNA expression differences in tumors localized in sigmoid and rectosigmoid parts compared to the other anatomic sites (ascending colon, cecum, descending colon, transverse colon, and rectum) in the COAD-8 READ TCGA cohort. A and B, horizontal bars indicate median values, boxes are interquartile range, whiskers indicate values within 1.5 times interquartile range.

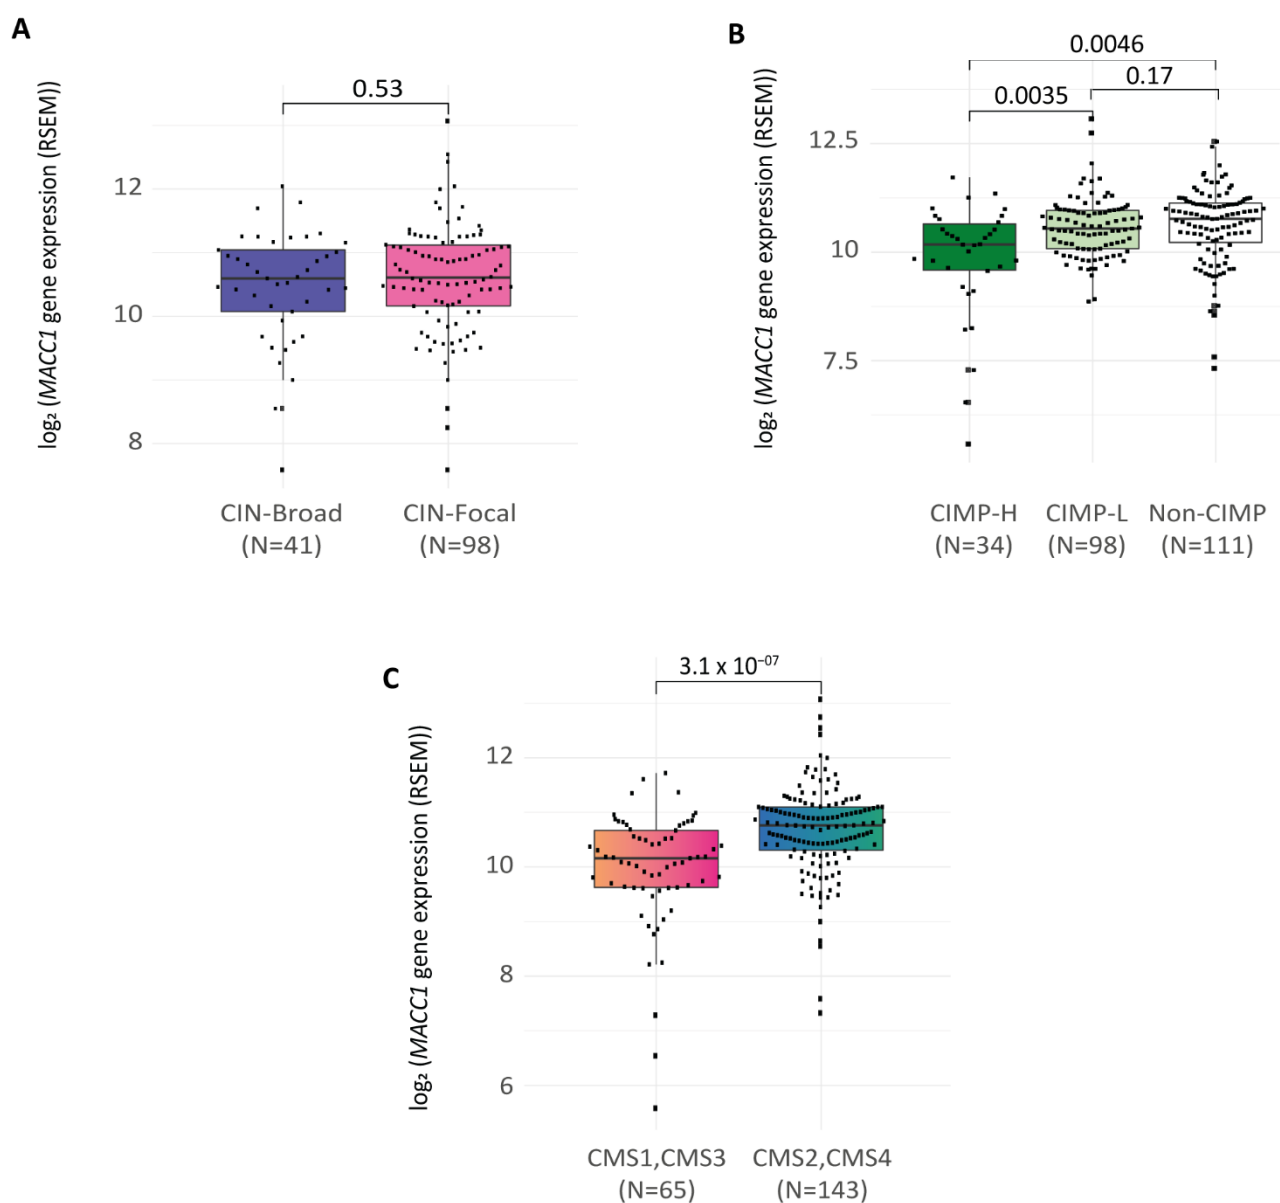

**Figure S4.** MACC1 mRNA expression and CIN, CIMP and CMS molecular subtypes in the COAD-READ TCGA cohort. A, Box plot showing MACC1 mRNA expression and CIN subgroups (CIN-Focal and CIN-Broad). B, Box plot showing MACC1 mRNA expression and tumors CpG island methylator phenotype (CIMP) status. C, Box plot showing MACC1 mRNA expression differences between CMS1-CMS3 and CMS2-CMS4 subtypes. A, B and C, horizontal bars indicate median values, boxes are interquartile range, whiskers indicate values within 1.5 times interquartile range.

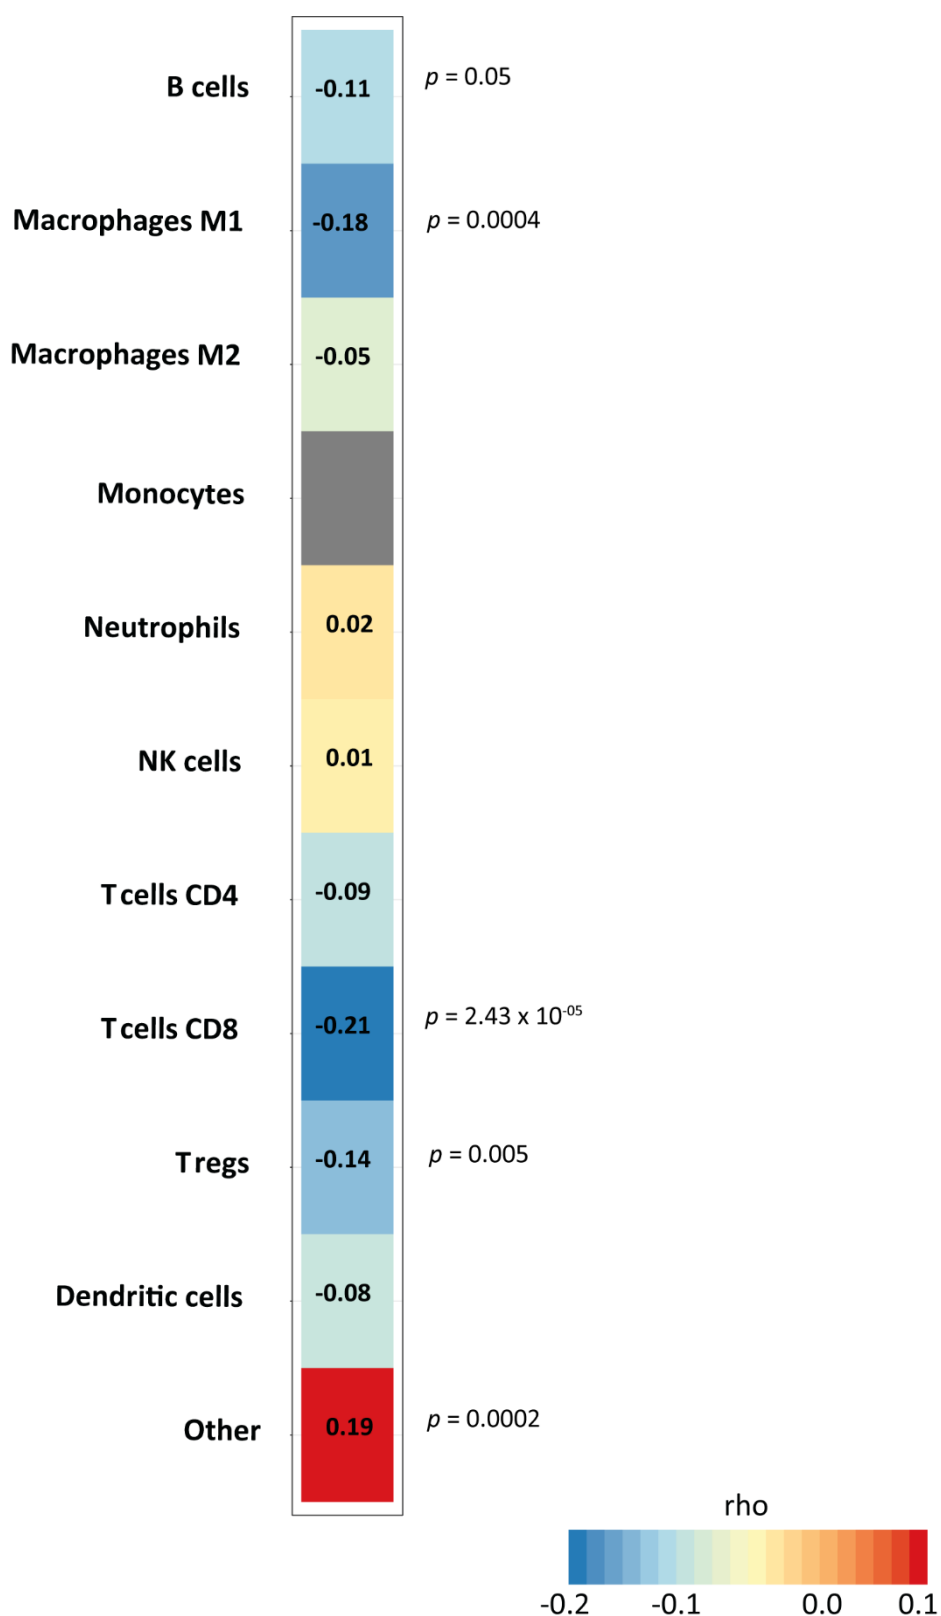

**Figure S5.** MACC1 mRNA expression and correlation with immune contexture of the tumors. A heatmap showing Spearman rho values between MACC1 mRNA expression levels and the proportion of different immune cell types estimated by quanTIseq in COAD-READ samples.

**Table S1.** Overview chart of the cohorts and the different methods used in the study.

| Main cohorts                            | Analysis                                                                            | Data type                                                                             | Source                   | Identifier                                                                                 |
|-----------------------------------------|-------------------------------------------------------------------------------------|---------------------------------------------------------------------------------------|--------------------------|--------------------------------------------------------------------------------------------|
| OncoTrack (N=90)                        | Correlation of <i>MACC1</i> SCNA and mRNA (I)                                       | <i>MACC1</i> SCNA (whole genome/exome sequencing) and mRNA (RNA-Seq)                  | Schütte M et al. [24]    | <a href="https://doi.org/10.1038/ncomms14262">DOI: 10.1038/ncomms14262</a>                 |
| Charité metastasis cohort (N=35)        | <i>MACC1</i> SCNA and CRC patient MFS                                               | <i>MACC1</i> SCNA (ddPCR) + clinical data                                             | Internal data            |                                                                                            |
| TCGA COAD-READ (N=632)                  | Correlation of <i>MACC1</i> SCNA and mRNA (II); association with clinical variables | <i>MACC1</i> SCNA (SNP6-GISTIC) + mRNA (RNA-Seq); + clinical data                     | Firehose/Broad institute | <a href="https://gdac.broadinstitute.org/">https://gdac.broadinstitute.org/</a>            |
| <b>Supplementary or derived cohorts</b> |                                                                                     |                                                                                       |                          |                                                                                            |
| CPTAC-2 prospective (N=48)              | Correlation <i>MACC1</i> protein and mRNA                                           | mRNA (RNA-Seq), protein (mass spectrometry)                                           | Vasaikar et al. [30]     | <a href="https://doi.org/10.1016/j.cell.2019.03.030">DOI: 10.1016/j.cell.2019.03.030</a>   |
| COAD-READ/GTEx (N=1,101)                | <i>MACC1</i> mRNA overexpression in CRC tumors compared with normal tissues         | mRNA (RNA-Seq) of COAD-READ tumors unified with normal tissues from the GTEx database | Wang et al. [27]         | <a href="https://doi.org/10.1038/sdata.2018.61">DOI: 10.1038/sdata.2018.61</a>             |
| Liu Y et al (COAD-READ subset) (N=243)  | <i>MACC1</i> mRNA and CRC molecular subtypes                                        | <i>MACC1</i> mRNA (RNA-Seq); + CRC molecular subtypes                                 | Liu Y et al. [28]        | <a href="https://doi.org/10.1016/j.ccell.2018.03.010">DOI: 10.1016/j.ccell.2018.03.010</a> |

**Table S2.** Patient characteristics of the Charité metastasis cohort (N=35).

| UICC stage.                          | I                  | II                | III           |               |
|--------------------------------------|--------------------|-------------------|---------------|---------------|
| N (%)                                | 9 (26%)            | 17 (48%)          | 9 (26%)       |               |
| <b>Sex</b>                           | <b>Male</b>        | <b>Female</b>     |               |               |
| N (%)                                | 19 (54%)           | 16 (46%)          |               |               |
| <b>Age group at diagnosis, years</b> | <b>30-50</b>       | <b>51-60</b>      | <b>61-70</b>  | <b>&gt;70</b> |
| N (%)                                | 5 (14%)            | 7 (20%)           | 14 (40%)      | 9 (26%)       |
| <b>Localization</b>                  | <b>Right colon</b> | <b>Left colon</b> | <b>Rectum</b> |               |
| N (%)                                | 12 (34%)           | 12 (34%)          | 11 (32%)      |               |
| <b>Metachronous metastasis</b>       | <b>No</b>          | <b>Yes</b>        |               |               |
| N (%)                                | 27 (77%)           | 8 (23%)           |               |               |

**Table S3.** Primers used for relative quantification of *MACC1* SCNAs.

| Gene                      | Primer position | Primer sequence         |
|---------------------------|-----------------|-------------------------|
| <i>MACC1</i> , amplicon 1 | 38345           | TCCCTTCCCTGGAGAATCTT    |
|                           | 38450           | TGCAGCTGATGATTCTGACC    |
| <i>MACC1</i> , amplicon 2 | 5368            | CACAGGGATATAACAGGAAGCTG |
|                           | 5572            | AGGCAGGTTTCCACATCATC    |
| <i>GATB1</i>              | 511             | AGTCAGAGCAAAAAGGCGGTA   |
|                           | 632             | AGGGGAAGAGGAAAGATGGA    |
| <i>NEURL4</i>             | 187             | AAGAAAGCAAGCCACTTGGA    |
|                           | 310             | CAGCCTGTCCCTACTGCTTC    |

**Table S4.** MACC1 expression levels and alterations in key cancer genes.

| Gene symbol   | Mean <i>MACC1</i> expression in mutated samples | Mean <i>MACC1</i> expression in wild-type samples | Median <i>MACC1</i> expression in mutated samples | Median <i>MACC1</i> expression in wild-type samples | Wilcoxon <i>p</i> value |
|---------------|-------------------------------------------------|---------------------------------------------------|---------------------------------------------------|-----------------------------------------------------|-------------------------|
| <i>KRAS</i>   | 10.37                                           | 10.62                                             | 10.52                                             | 10.76                                               | <u>0.005</u>            |
| <i>POLE</i>   | 9.85                                            | 10.53                                             | 10.02                                             | 10.61                                               | <u>0.042</u>            |
| <i>HRAS</i>   | 9.88                                            | 10.49                                             | 10.06                                             | 10.58                                               | 0.133                   |
| <i>TP53</i>   | 10.5                                            | 10.38                                             | 10.62                                             | 10.43                                               | 0.138                   |
| <i>TGFBR2</i> | 10.07                                           | 10.52                                             | 10.37                                             | 10.59                                               | 0.139                   |
| <i>MLH1</i>   | 10.36                                           | 10.52                                             | 10.43                                             | 10.64                                               | 0.165                   |
| <i>PTEN</i>   | 10.51                                           | 10.38                                             | 10.62                                             | 10.52                                               | 0.249                   |
| <i>SMAD4</i>  | 10.4                                            | 10.56                                             | 10.56                                             | 10.58                                               | 0.316                   |
| <i>BRAF</i>   | 10.48                                           | 10.48                                             | 10.57                                             | 10.58                                               | 0.575                   |
| <i>NRAS</i>   | 10.56                                           | 10.47                                             | 10.77                                             | 10.55                                               | 0.618                   |
| <i>APC</i>    | 10.48                                           | 10.43                                             | 10.58                                             | 10.59                                               | 0.769                   |
| <i>PIK3CA</i> | 10.47                                           | 10.5                                              | 10.57                                             | 10.64                                               | 0.868                   |

**Table S5.** Multivariate Cox analysis including MACC1 expression, tumor size, stage and nodal status.

|                     | Factor                                 | N         | DFS<br>HR [CI]     | <i>p</i> value | N         | OS<br>HR [CI]       | <i>p</i> value |
|---------------------|----------------------------------------|-----------|--------------------|----------------|-----------|---------------------|----------------|
|                     |                                        |           |                    |                |           |                     |                |
| <b>Multivariate</b> | <i>MACC1</i> expression (High vs. Low) | 154 - 167 | 1.69 [1.10 – 2.60] | <u>0.02</u>    | 181 - 185 | 1.44 [0.92– 2.55]   | 0.11           |
|                     | T3–T4 vs. T1–T2                        | 264 - 57  | 2.70 [1.06 – 6.87] | <u>0.03</u>    | 302 - 64  | 1.21 [0.53 – 2.77]  | 0.65           |
|                     | Ns vs. N0                              | 139 - 182 | 1.02 [0.31 – 3.30] | 0.97           | 165 - 201 | 0.46 [0.18 – 1.20]  | 0.11           |
|                     | Stage: III–IV vs. I–II                 | 148 - 173 | 2.09 [0.62 – 6.99] | 0.23           | 177 - 189 | 5.44 [1.98 – 14.93] | <u>0.001</u>   |
